# Supplementary material
Source: Springer Nature journal article supplement (https://www.springermedizin.de/resource/supplementary/12874_2012_826_MOESM3_ESM.pdf/9432702)

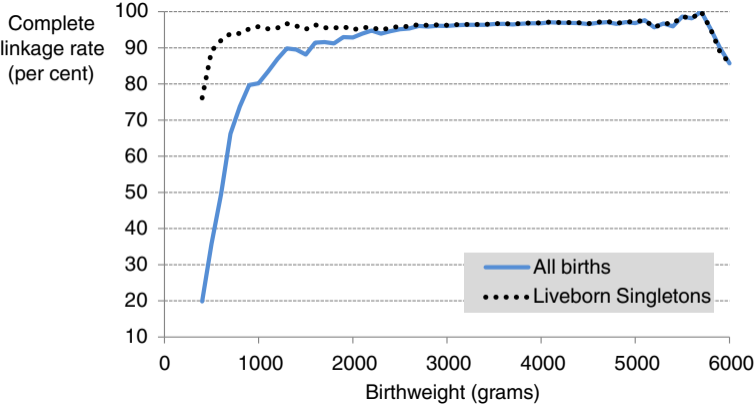

Supplement: MOESM3 [file 9432702]
